# Supplementary material for: Potential Rhodopsin- and Bacteriochlorophyll-Based Dual Phototrophy in a High Arctic Glacier
Source: PubMed Central journal article supplement (PMC7701988; doi:10.1128/mbio.02641-20), 2020-11-24
Supplement: mBio.02641-20-sf001.pdf [file mBio.02641-20-sf001.pdf]

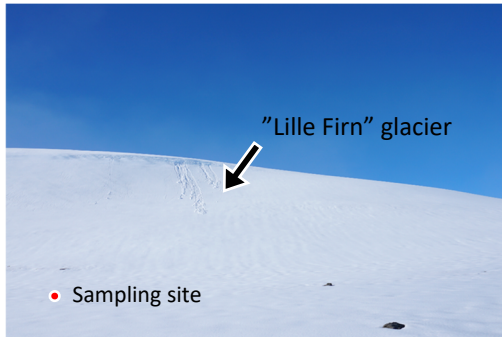

Sampled on 2 July 2018

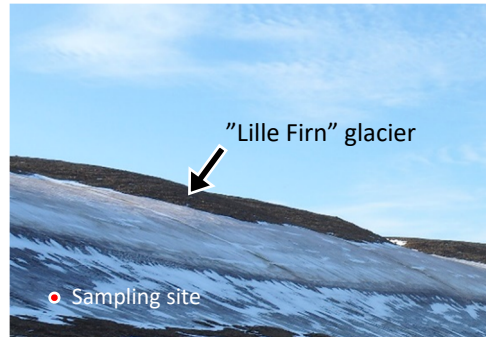

Photographed in August 2017

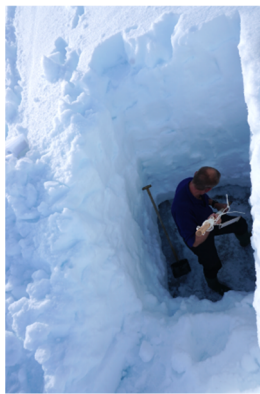

Fieldwork on 2 July, 2018

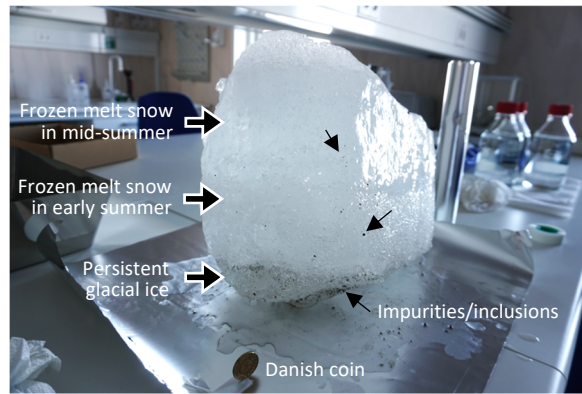

Sampled ice

**Figure S1** Photographs showing the sampling site, fieldwork, and visual inspection of a sampled ice block.
