# Supplementary material for: Potential Rhodopsin- and Bacteriochlorophyll-Based Dual Phototrophy in a High Arctic Glacier
Source: PubMed Central journal article supplement (PMC7701988; doi:10.1128/mbio.02641-20), 2020-11-24
Supplement: mBio.02641-20-sf002.pdf [file mBio.02641-20-sf002.pdf]

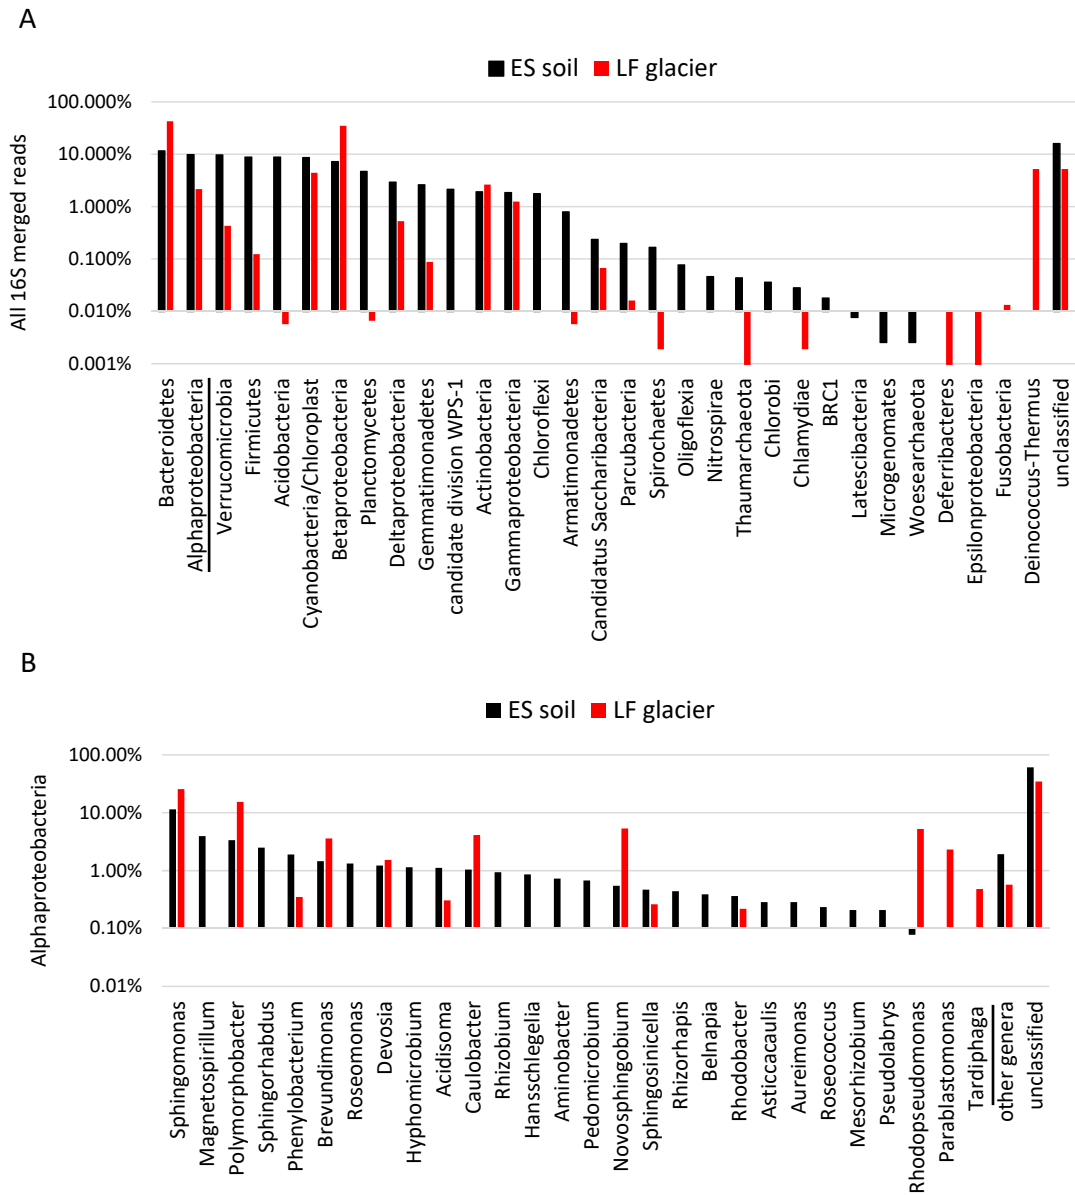

**Figure S2** Composition of total bacterial communities in LF and ES at the phylum level (A) highlighting Alphaproteobacteria that contains the *Tardiphaga* genus (B).
