# Supplementary material for: Potential Rhodopsin- and Bacteriochlorophyll-Based Dual Phototrophy in a High Arctic Glacier
Source: PubMed Central journal article supplement (PMC7701988; doi:10.1128/mbio.02641-20), 2020-11-24
Supplement: mBio.02641-20-sf003.pdf [file mBio.02641-20-sf003.pdf]

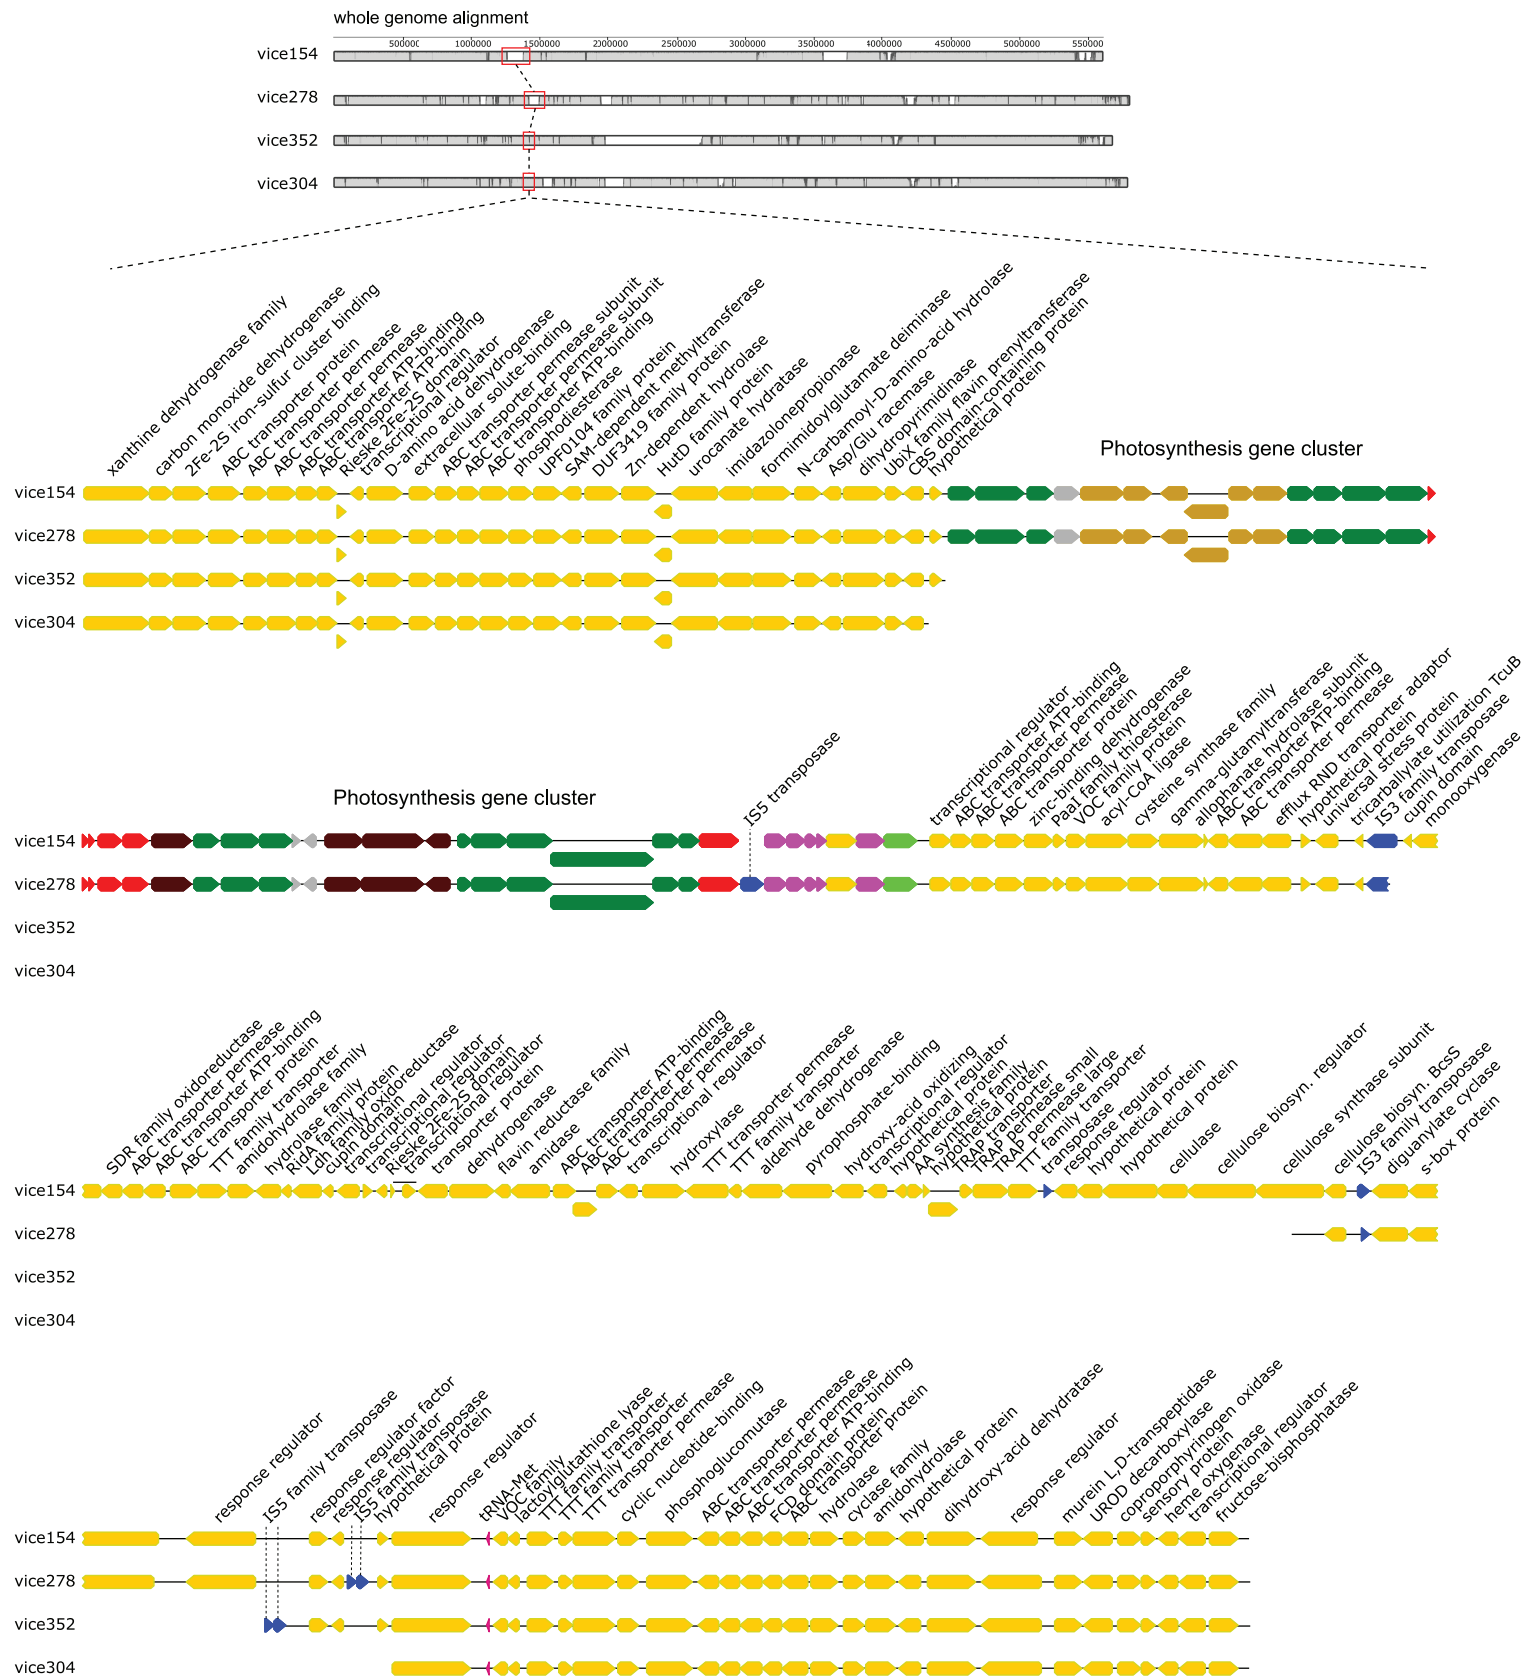

**Figure S3** Annotated genomic regions surrounding the photosynthesis gene cluster in *Tardiphaga* strains vice154 and vice278 in comparison to strains vice304 and vice352 that do not contain a photosynthesis gene cluster.
