# Supplementary material for: Potential Rhodopsin- and Bacteriochlorophyll-Based Dual Phototrophy in a High Arctic Glacier
Source: PubMed Central journal article supplement (PMC7701988; doi:10.1128/mbio.02641-20), 2020-11-24
Supplement: mBio.02641-20-sf004.pdf [file mBio.02641-20-sf004.pdf]

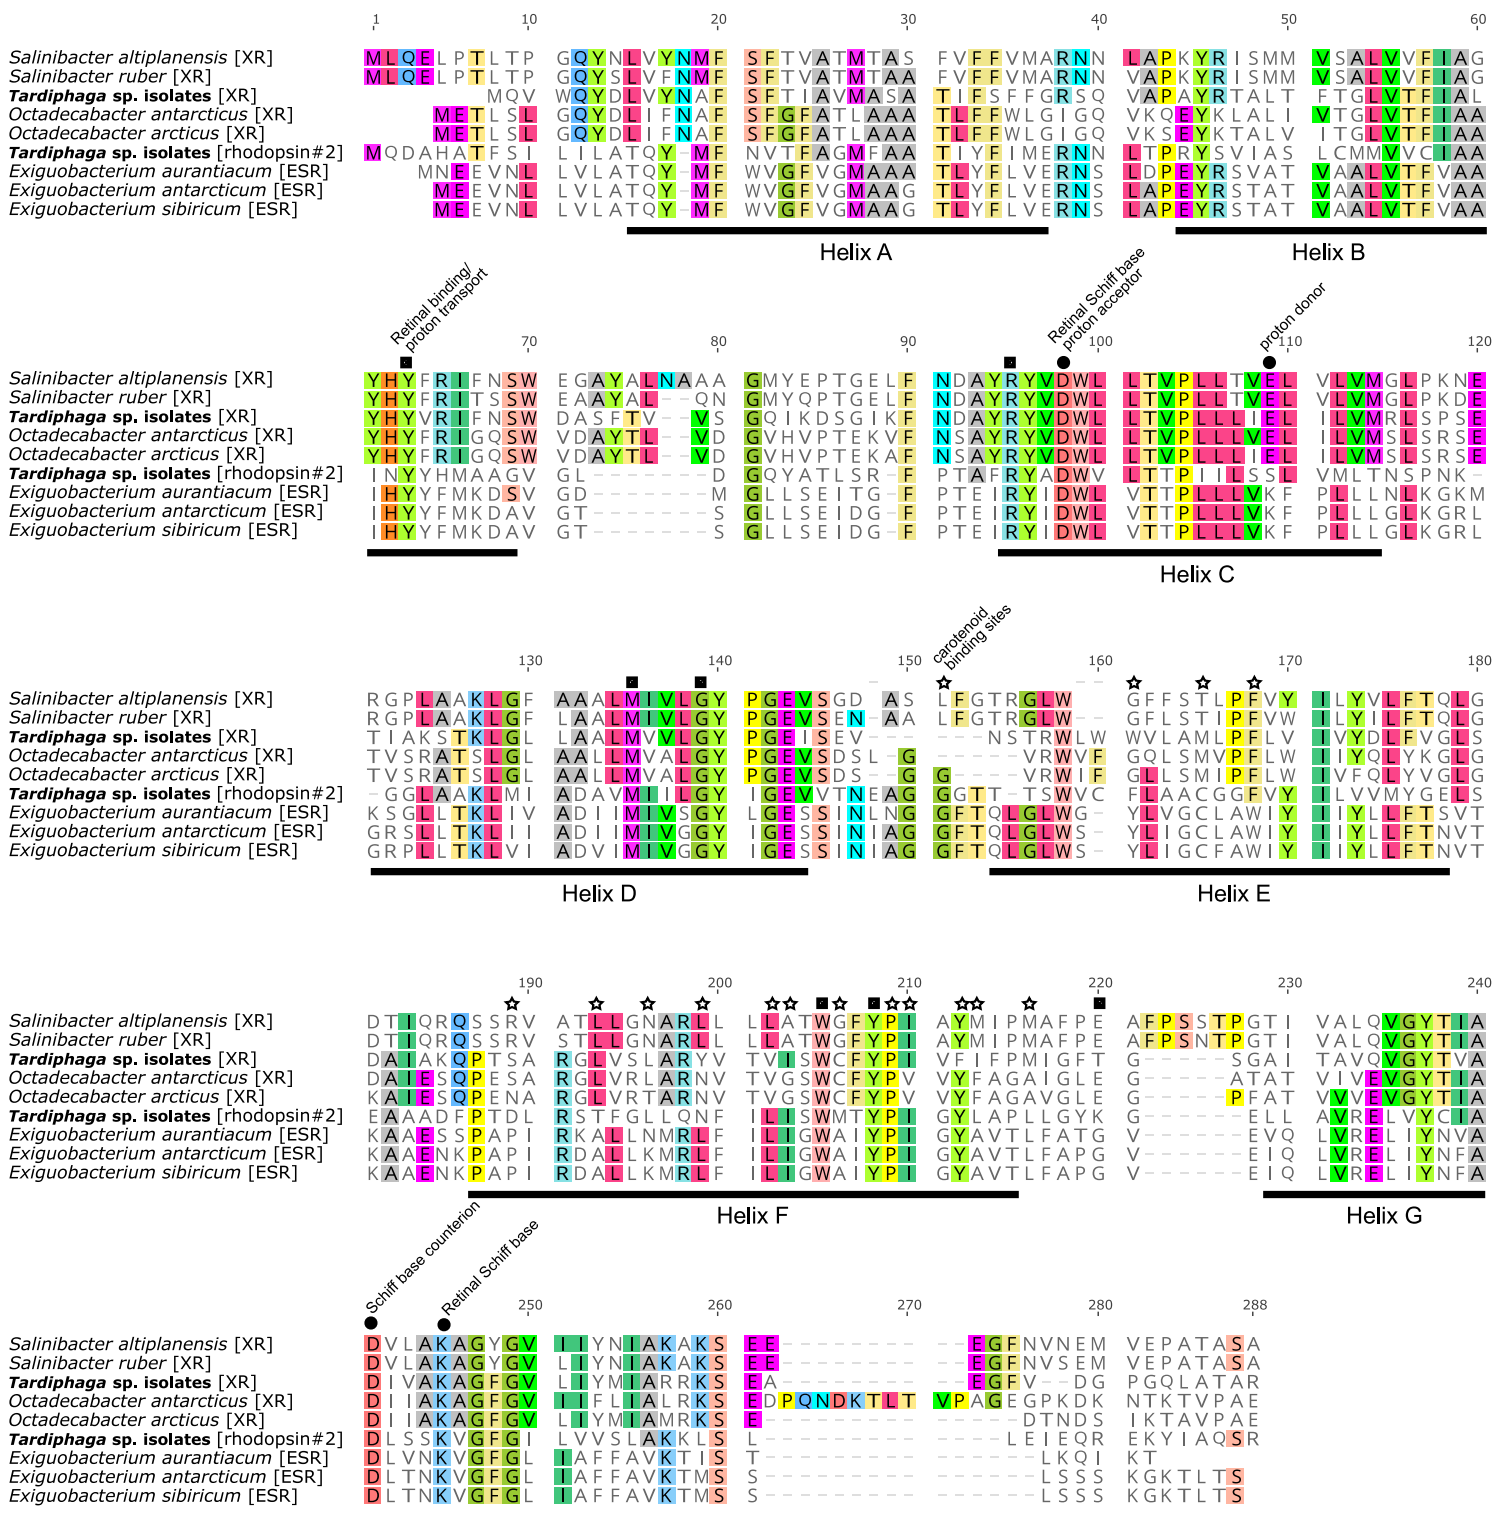

**Figure S4** Protein sequence alignment showing the presence of residues in *Tardiphaga*'s xanthorhodopsin that are key to its function as a proton pump.
