# Supplementary material for: Potential Rhodopsin- and Bacteriochlorophyll-Based Dual Phototrophy in a High Arctic Glacier
Source: PubMed Central journal article supplement (PMC7701988; doi:10.1128/mbio.02641-20), 2020-11-24
Supplement: mBio.02641-20-sf005.pdf [file mBio.02641-20-sf005.pdf]

XR operon

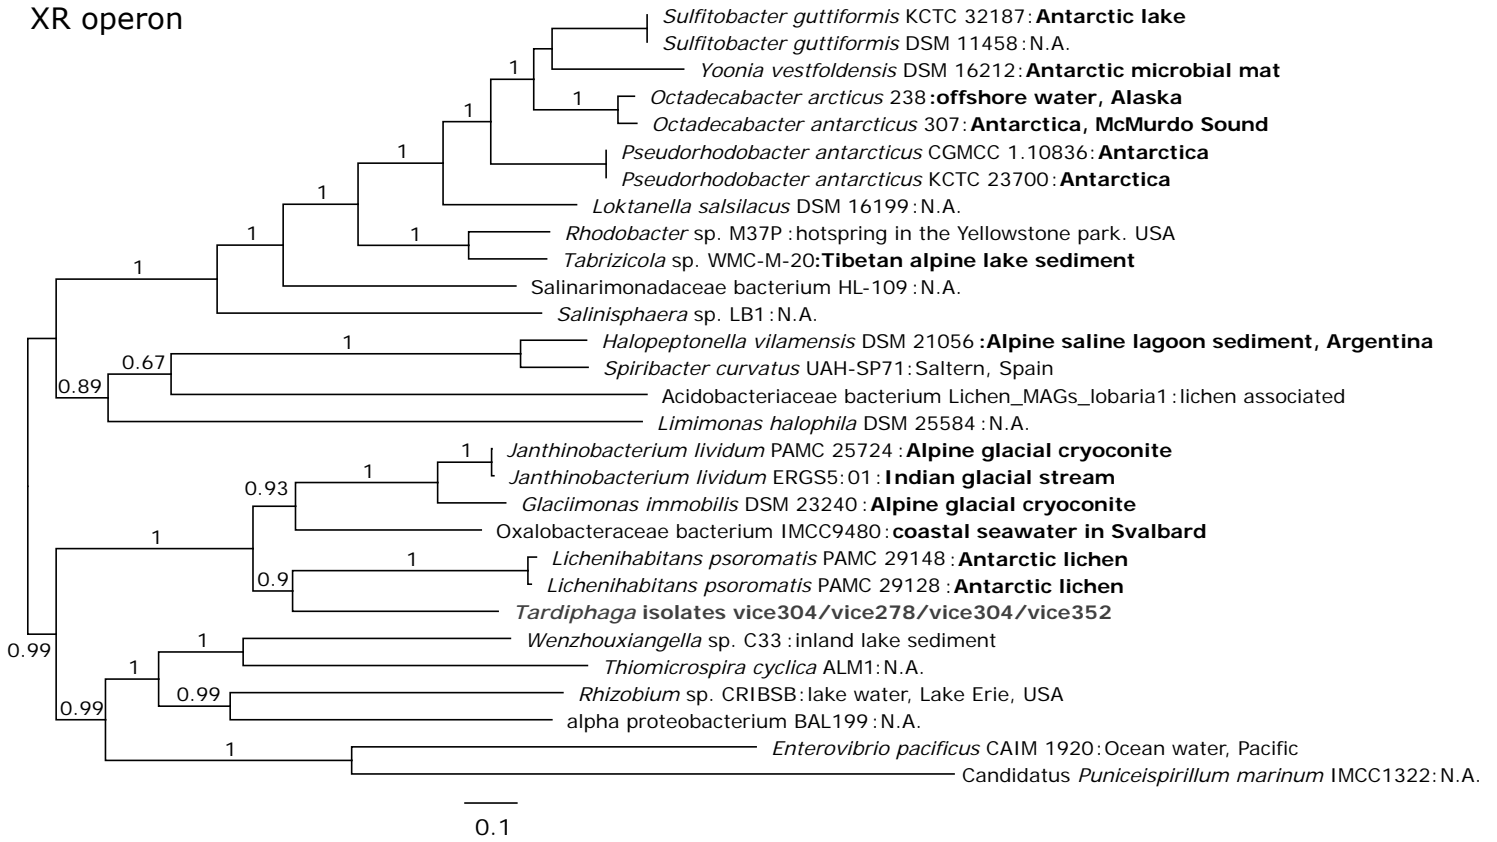

**Figure S5** Maximum-likelihood phylogeny of the whole XR operon of *Tardiphaga* isolates and their top tBLASTn hits in NCBI's genome database.
