# Supplementary material for: Potential Rhodopsin- and Bacteriochlorophyll-Based Dual Phototrophy in a High Arctic Glacier
Source: PubMed Central journal article supplement (PMC7701988; doi:10.1128/mbio.02641-20), 2020-11-24
Supplement: mBio.02641-20-st001.pdf [file mBio.02641-20-st001.pdf]

**Table S1** Summary of the complete genomes of the four *Tardiphaga* strains isolated from the “Little Firn” glacier in northeast Greenland. PGC, photosynthesis gene cluster; XR, xanthorhodopsin. CDS, coding sequence.

| Isolate | Genome Size (bp) | GC content | Number of genes |      |              |               |                |                        | PGC | XR | GenBank accession no. |
|---------|------------------|------------|-----------------|------|--------------|---------------|----------------|------------------------|-----|----|-----------------------|
|         |                  |            | rRNA operon     | tRNA | Protein CDSs | Trans- posase | Phage- related | Recombinase /integrase |     |    |                       |
| vice154 | 5,609,510        | 63.59%     | 2               | 51   | 5,001        | 109           | 18             | 16                     | +   | +  | CP041399              |
| vice278 | 5,806,756        | 63.36%     | 2               | 53   | 5,196        | 222           | 38             | 28                     | +   | +  | CP041400              |
| vice304 | 5,788,809        | 63.28%     | 2               | 53   | 5,192        | 207           | 28             | 33                     | -   | +  | CP041402              |
| vice352 | 5,678,525        | 63.37%     | 2               | 52   | 5,094        | 180           | 41             | 26                     | -   | +  | CP041401              |
