# Supplementary material for: Potential Rhodopsin- and Bacteriochlorophyll-Based Dual Phototrophy in a High Arctic Glacier
Source: PubMed Central journal article supplement (PMC7701988; doi:10.1128/mbio.02641-20), 2020-11-24
Supplement: mBio.02641-20-st004.pdf [file mBio.02641-20-st004.pdf]

**Table S4** Survey of key functional genes with biogeochemical or energetic importance in the genomes of *Tardiphaga* isolates. The gene list was compiled from the FunGen pipeline (<http://fungene.cme.msu.edu/>) and the authors' own collection.

| Category                                         | Gene    | Enzyme                                                                 | vice154 | vice278 | vice304 | vice352 |
|--------------------------------------------------|---------|------------------------------------------------------------------------|---------|---------|---------|---------|
| C metabolism                                     | scd2    | esterase / lipase                                                      | ●       | ●       | ●       | ●       |
| C metabolism                                     | xylA    | xylose isomerase                                                       | ○       | ○       | ○       | ○       |
| One carbon metabolism                            | cooS    | carbon monoxide dehydrogenase                                          | ○       | ○       | ○       | ○       |
| One carbon metabolism                            | pmoA    | particulate methane monooxygenase A-subunit                            | ○       | ○       | ○       | ○       |
| One carbon metabolism                            | pxmA1   | particulate methane monooxygenase beta subunit                         | ○       | ○       | ○       | ○       |
| One carbon metabolism                            | prk     | phosphoribulokinase                                                    | ●       | ●       | ●       | ●       |
| One carbon metabolism                            | cbbL    | ribulose-bisphosphate carboxylase large subunit                        | ●       | ●       | ●       | ●       |
| One carbon metabolism                            | cbbM    | ribulose-bisphosphate carboxylase small subunit                        | ●       | ●       | ●       | ●       |
| One carbon metabolism                            | smmo    | soluble methane monooxygenase                                          | ●       | ●       | ●       | ●       |
| N metabolism                                     | amiE    | aliphatic amidase                                                      | ●       | ●       | ●       | ●       |
| N metabolism                                     | amoA    | ammonia monooxygenase subunit A                                        | ○       | ○       | ○       | ○       |
| N metabolism                                     | ansA    | asparaginase                                                           | ○       | ○       | ○       | ○       |
| N metabolism                                     | aspA    | aspartate ammonia-lyase                                                | ○       | ○       | ○       | ○       |
| N metabolism                                     | glsA    | glutaminase                                                            | ●       | ●       | ●       | ●       |
| N metabolism                                     | hutH    | histidine ammonia-lyase                                                | ○       | ○       | ○       | ○       |
| N metabolism                                     | norB    | nitric oxide reductase                                                 | ○       | ○       | ○       | ○       |
| N metabolism                                     | p450nor | nitric oxide reductase (NAD(P), nitrous oxide-forming)                 | ○       | ○       | ○       | ○       |
| N metabolism                                     | nir     | nitrite reductase                                                      | ●       | ●       | ●       | ●       |
| N metabolism                                     | nifH    | nitrogenase iron protein                                               | ○       | ○       | ○       | ○       |
| N metabolism                                     | nifD    | nitrogenase iron-iron protein, alpha chain                             | ○       | ○       | ○       | ○       |
| N metabolism                                     | nifD    | nitrogenase molybdenum-iron protein subunit alpha                      | ○       | ○       | ○       | ○       |
| N metabolism                                     | vnfD    | nitrogenase vanadium-iron protein alpha chain                          | ○       | ○       | ○       | ○       |
| N metabolism                                     | nosZ    | nitrous oxide reductase catalytic subunit                              | ○       | ○       | ○       | ○       |
| N metabolism                                     | napA    | periplasmic nitrate reductase catalytic subunit                        | ●       | ●       | ●       | ●       |
| N metabolism                                     | napE    | periplasmic nitrate reductase subunit                                  | ●       | ●       | ●       | ●       |
| N metabolism                                     | apr     | serine 3-dehydrogenase                                                 | ○       | ○       | ○       | ○       |
| N metabolism                                     | ureC    | urease                                                                 | ●       | ●       | ●       | ●       |
| P metabolism                                     | phy     | 4-phytase                                                              | ●       | ●       | ●       | ●       |
| P metabolism                                     | alp     | alkaline phosphatase                                                   | ●       | ●       | ●       | ●       |
| P metabolism                                     | phnX    | phosphonoacetaldehyde dehydrogenase                                    | ○       | ○       | ○       | ○       |
| P metabolism                                     | PPK     | polyphosphate kinase                                                   | ●       | ●       | ●       | ●       |
| S metabolism                                     | dsrA    | dissimilatory sulfite reductase alpha subunit                          | ●       | ●       | ●       | ●       |
| S metabolism                                     | soxB    | sulfur oxidation protein / thiosulfohydrolase                          | ●       | ●       | ●       | ●       |
| Plant material utilization                       | cbh1    | cellobiohydrolase                                                      | ○       | ○       | ○       | ○       |
| Plant material utilization                       | chiA    | chitinase                                                              | ○       | ○       | ○       | ○       |
| Plant material utilization                       | chb     | chitobiase                                                             | ○       | ○       | ○       | ○       |
| Plant material utilization                       | ligE    | glutathione S-transferase                                              | ○       | ○       | ○       | ○       |
| Plant material utilization                       | lcc     | laccase                                                                | ○       | ○       | ○       | ○       |
| Plant material utilization                       | lip     | lignin peroxidase                                                      | ○       | ○       | ○       | ○       |
| Plant material utilization                       | appA    | phosphoanhydride phosphohydrolase                                      | ○       | ○       | ○       | ○       |
| Protein catabolism                               | npr     | bacillolysin                                                           | ○       | ○       | ○       | ○       |
| Protein catabolism                               | sub     | subtilisin                                                             | ○       | ○       | ○       | ○       |
| Protein catabolism                               | trp     | trypsin                                                                | ●       | ●       | ●       | ●       |
| Phototrophy                                      | acsF    | magnesium-protoporphyrin IX monomethyl ester aerobic oxidative cyclase | ●       | ●       | ●       | ●       |
| Phototrophy                                      | pufL    | photosynthetic reaction center subunit L                               | ●       | ●       | ●       | ●       |
| Phototrophy                                      | pufM    | photosynthetic reaction center subunit M                               | ●       | ●       | ●       | ●       |
| Phototrophy                                      | rho     | rhodopsin                                                              | ●       | ●       | ●       | ●       |
| Oxygen fluctuation                               | ctaD    | cytochrome c oxidase subunit, aa3-type, low affinity                   | ●       | ●       | ●       | ●       |
| Oxygen fluctuation                               | cydA    | cytochrome bd-I ubiquinol oxidase subunit 1, bd-type, high affinity    | ●       | ●       | ●       | ●       |
| Oxygen fluctuation                               | cyoB    | cytochrome bo(3) ubiquinol oxidase subunit, bo3-type, low affinity     | ●       | ●       | ●       | ●       |
| Oxygen fluctuation                               | cbaA    | cytochrome c oxidase subunit, ba3-type, high affinity                  | ●       | ●       | ●       | ●       |
| Oxygen fluctuation                               | fixN    | cytochrome c oxidase subunit, cbb3-type, high affinity                 | ●       | ●       | ●       | ●       |
| Oxygen fluctuation                               | ccoN    | cytochrome c oxidase subunit, cbb3-type, high affinity                 | ○       | ○       | ○       | ○       |
| Sense and regulation                             | PAP     | serine/threonine protein phosphatase                                   | ●       | ○       | ●       | ●       |
| Sense and regulation                             | PTP     | tyrosine protein phosphatase                                           | ●       | ●       | ●       | ●       |
| Other - acetate metabolism                       | acs     | acetyl-CoA synthetase                                                  | ○       | ○       | ○       | ○       |
| Other - animal material utilization              | col     | collagenase                                                            | ○       | ○       | ○       | ○       |
| Other - arginine catabolism                      | rocF    | arginase                                                               | ●       | ●       | ●       | ●       |
| Other - folate metabolism                        | cpg     | glutamate carboxypeptidase                                             | ○       | ○       | ○       | ○       |
| Other - glycan metabolism                        | nag3    | beta-hexosaminidase                                                    | ○       | ○       | ○       | ○       |
| Other - H metabolism                             | hydA    | iron hydrogenase                                                       | ○       | ○       | ○       | ○       |
| Other - H <sub>2</sub> O <sub>2</sub> generation | glx     | glyoxaloxidase 1                                                       | ○       | ○       | ○       | ○       |
| Other - methanogenesis                           | mcrA    | methyl-coenzyme M reductase, alpha subunit                             | ○       | ○       | ○       | ○       |
| Other - oligosaccharides metabolism              | exc1    | beta-N-acetylglucosaminidase                                           | ○       | ○       | ○       | ○       |
| Other - phenol degradation                       | ppo     | phenoloxidase                                                          | ○       | ○       | ○       | ○       |
| Other - purine metabolism                        | add     | adenosine deaminase                                                    | ○       | ○       | ○       | ○       |
